# Supplementary material
Source: MDPI journal article supplement (https://www.mdpi.com/2073-4344/13/3/619)
Supplement: s1 [file s1]

Supplementary Materials

# Fe Single Atoms Reduced by $\text{NaBH}_4$ Mediate $\text{g-C}_3\text{N}_4$ Electron Transfer and Effectively Remove 2-Mercaptobenzothiazole

Chen Yang, Xuefeng Hu \*, Yaxing Bai, Beichuan Cai and Yujie Li

School of Environmental Science and Engineering, Shaanxi University of Science and Technology, Xi'an 710021, China

\* Correspondence: huxuefeng@sust.edu.cn

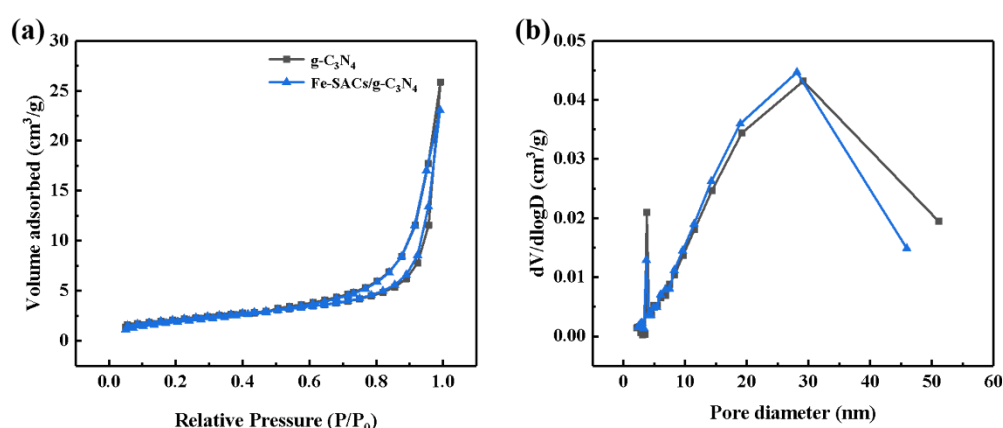

**Figure S1.**  $\text{N}_2$  adsorption-desorption isotherms of the  $\text{g-C}_3\text{N}_4$  and  $\text{Fe-SACs/g-C}_3\text{N}_4$  (a) BJH pore size distribution curves of as-prepared photocatalysts (b).

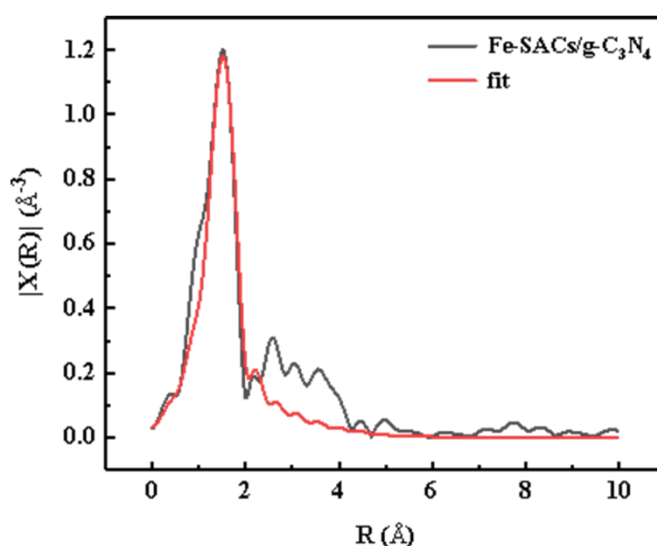

**Figure S2.** The EXAFS R space fitting curves of  $\text{Fe-SACs/g-C}_3\text{N}_4$ .

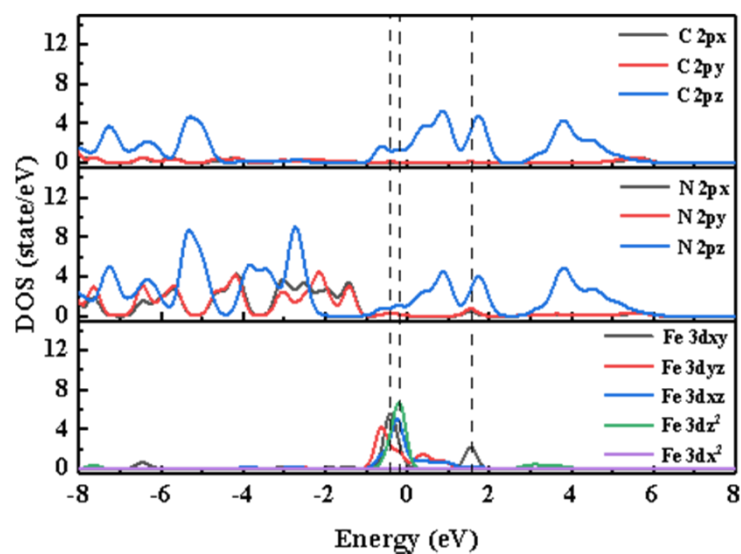

Figure S3. Projected density of states of the Fe-N4 system.

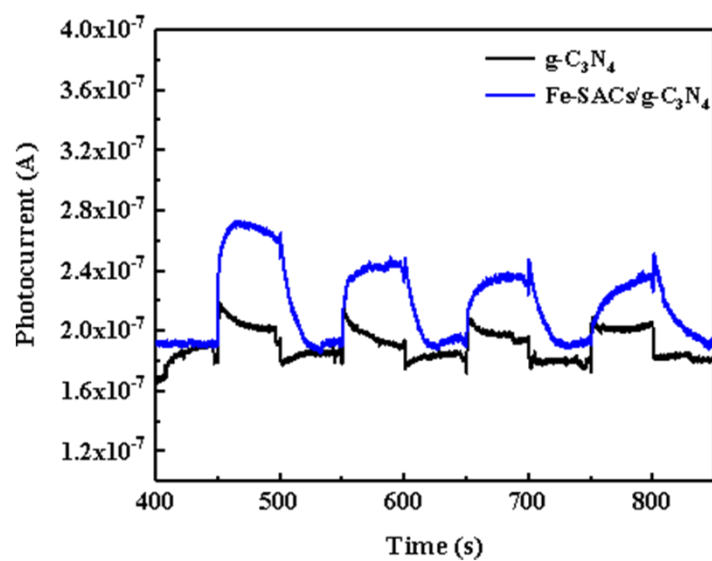

Figure S4. Photocurrent density of the g-C<sub>3</sub>N<sub>4</sub> and Fe-SACs/g-C<sub>3</sub>N<sub>4</sub>.

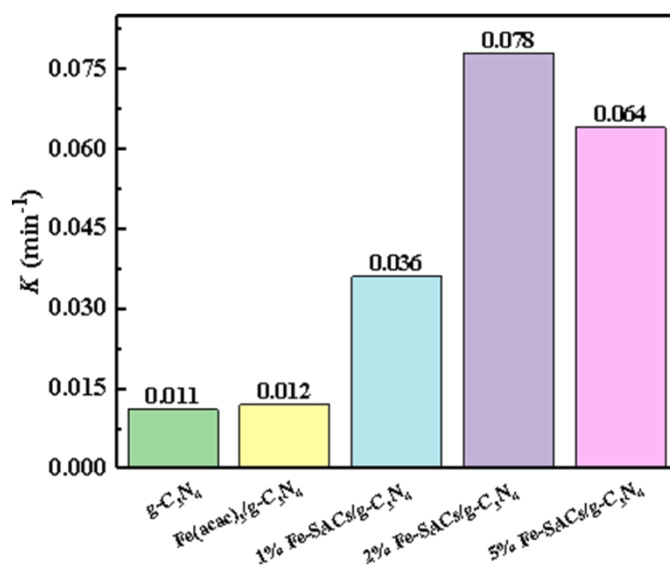

Figure S5. Degradation rate constants of different photocatalysts.

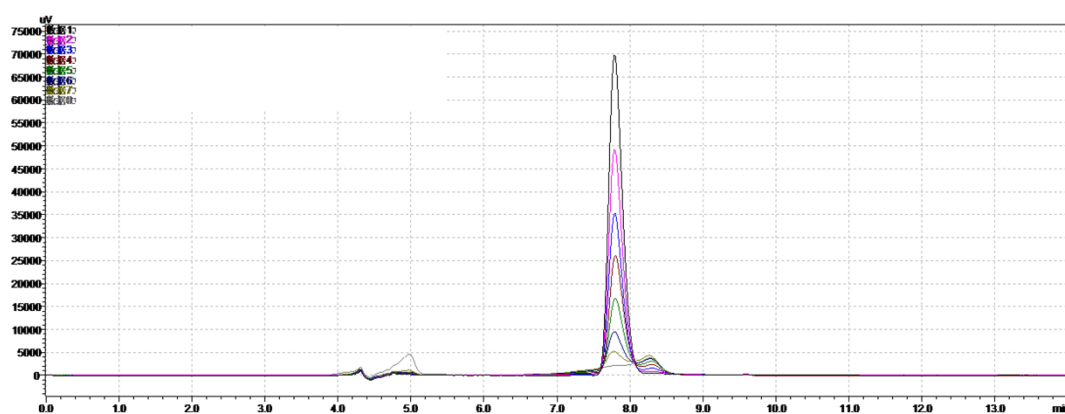

Figure S6. UV-Vis spectral changes of MBT during photoreaction.

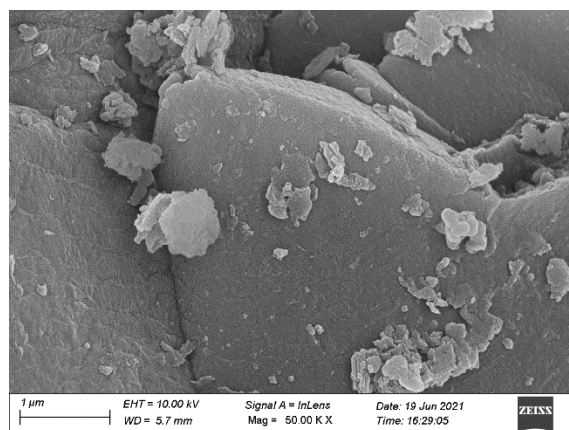

Figure S7. SEM of used Fe-SACs/ $\text{g-C}_3\text{N}_4$  photocatalyst.

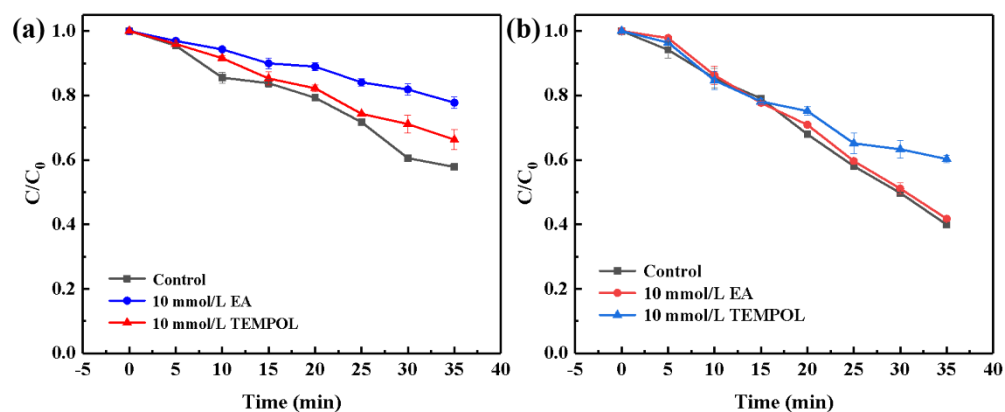

**Figure S8.** The photocatalytic activity of  $g-C_3N_4$  (a),  $Fe(acac)_3/g-C_3N_4$  (b) for degrading MBT with the presence of various scavengers.

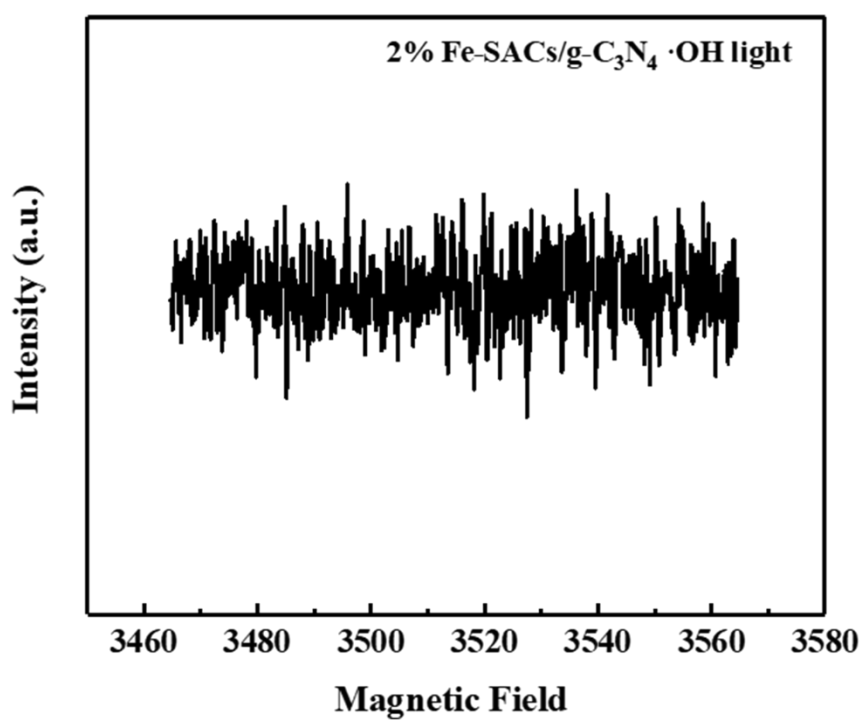

**Figure S9.** The EPR spectrum of DMPO-OH in the presence of Fe-SACs/g-C<sub>3</sub>N<sub>4</sub>.

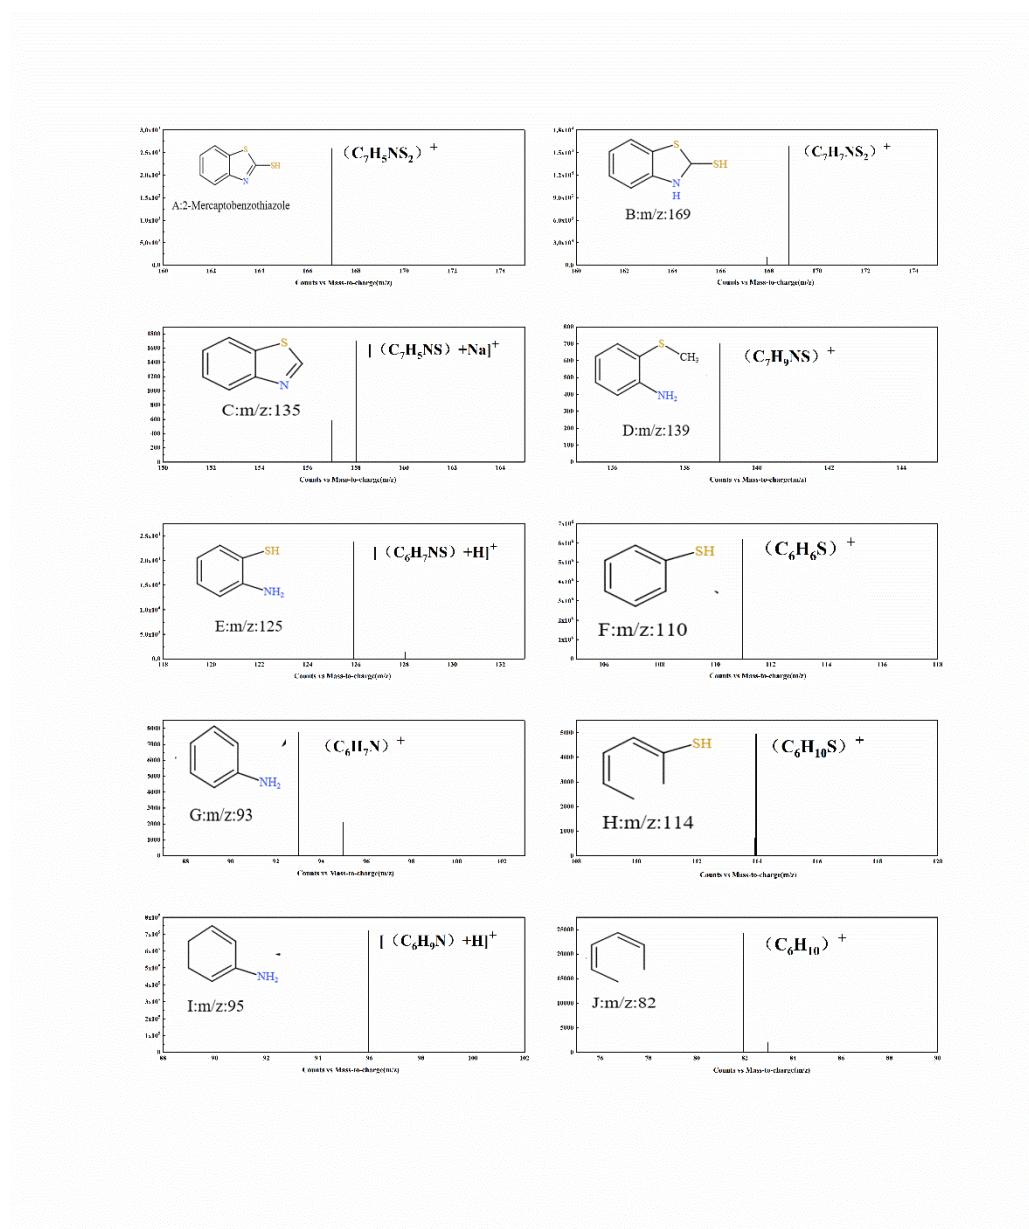

**Figure S10.** LC-MS spectra of MBT intermediates in the degradation reaction with Fe-SACs/g-C<sub>3</sub>N<sub>4</sub>.

**Table S1.** ICP Test Details.

| Sample                                     | Sampling Quality/g | Constant Volume/mL | Measured Element | Instrument Readings | Quality Score % |
|--------------------------------------------|--------------------|--------------------|------------------|---------------------|-----------------|
| 2% Fe-SACs/g-C <sub>3</sub> N <sub>4</sub> | 0.0141             | 25                 | Fe               | 0.59228             | 0.1050%         |

**Table S2.** The FWHM data and crystallite size of (002) peak.

|                  | g-C <sub>3</sub> N <sub>4</sub> | Fe(acac) <sub>3</sub> /g-C <sub>3</sub> N <sub>4</sub> | Fe-SACs/g-C <sub>3</sub> N <sub>4</sub> |
|------------------|---------------------------------|--------------------------------------------------------|-----------------------------------------|
| FWHM             | 2.22                            | 2.23                                                   | 2.43                                    |
| crystallite size | 3.85                            | 3.82                                                   | 3.51                                    |

**Table S3.** Parameters of EXAFS fits for Fe-SACs/g-C<sub>3</sub>N<sub>4</sub>.

| Sample  | Shell  | N <sup>a</sup> | R (Å) <sup>b</sup> | $\sigma^2$ (Å <sup>2</sup> ·10 <sup>-3</sup> ) <sup>c</sup> | $\Delta E_0$ (eV) <sup>d</sup> | R factor (%) |
|---------|--------|----------------|--------------------|-------------------------------------------------------------|--------------------------------|--------------|
| Fe foil | Fe-Fe1 | 8*             | 2.473-/±0.016      | 5.32-/±0.64                                                 | 3.54-/±1.89                    | 0.7          |
|         | Fe-Fe2 | 6*             | 2.813-/±0.023      | 6.45-/±1.81                                                 | 5.23-/±2.10                    |              |
| Sample  | Fe-N   | 4.2-/±0.3      | 2.010-/±0.026      | 5.79-/±3.90                                                 | 0.73/±4.70                     | 1.4%         |

<sup>a</sup> N: coordination numbers; <sup>b</sup> R: bond distance; <sup>c</sup>  $\sigma^2$ : Debye-Waller factors; <sup>d</sup>  $\Delta E_0$ : the inner potential correction. R factor: goodness of fit.
